# Supplementary material
Source: publisher figshare collection journal article supplement (https://acs.figshare.com/ndownloader/files/4001104)

## **SUPPORTING INFORMATION AVAILABLE**

### **Supplementary Figure 1**

The average numbers of offspring in each selection. In the first time select, the population was collected in rice fields. The following procedure was used to select the high-fecundity population (HFP) and low-fecundity population (LFP). “\*” means statistically significant difference in the average numbers of offspring between HFP and LFP (t-test,  $p < 0.05$ ), “\*\*\*” means statistically highly significant difference in the average numbers of offspring between HFP and LFP (t-test,  $p < 0.01$ )

### **Supplementary Figure 2**

The isolated protein spots, which have dynamic change regulation, were subjected to in-gel digestion and MALDI-TOF/TOF analysis. The obtained protein PMF and MS/MS data spectra were submitted to the *N.lugens* EST, NCBItr and the EST\_others database for identification, for example, spot b41 was identified as glutamine synthetase 2. (A) PMF spectrum; (B) MS/MS spectrum

### **Supplementary Figure 3**

Validation of de novo gene expression levels using assemblies of BPH transcriptomics. The log10 (RPKM) values from the HFP were regressed against those from the LFP. (A) Expression level for 2<sup>nd</sup> day 5<sup>th</sup> instar nymph in the BPH transcriptome. (B) Expression level for 2<sup>nd</sup> day brachypterous female in the BPH transcriptome. RPKM number is for reads per kilobase of node per million reads.

### **Supplementary Figure 4**

Detection of the specific *wsp* gene of *Wolbachia* in the two populations. In the high

fertility population, only one *wsp* gene was detected in BPH. By contrast, there were no *wsp* genes detected in the low fertility population.

Supplementary Fig.1

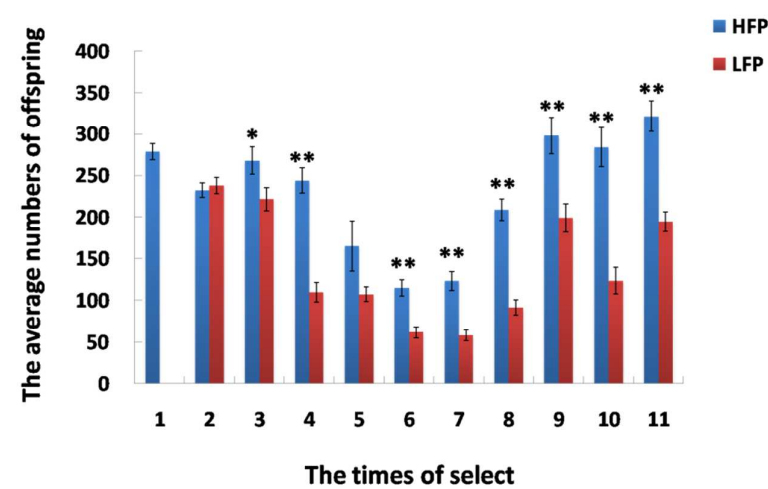

Supplementary Fig.2

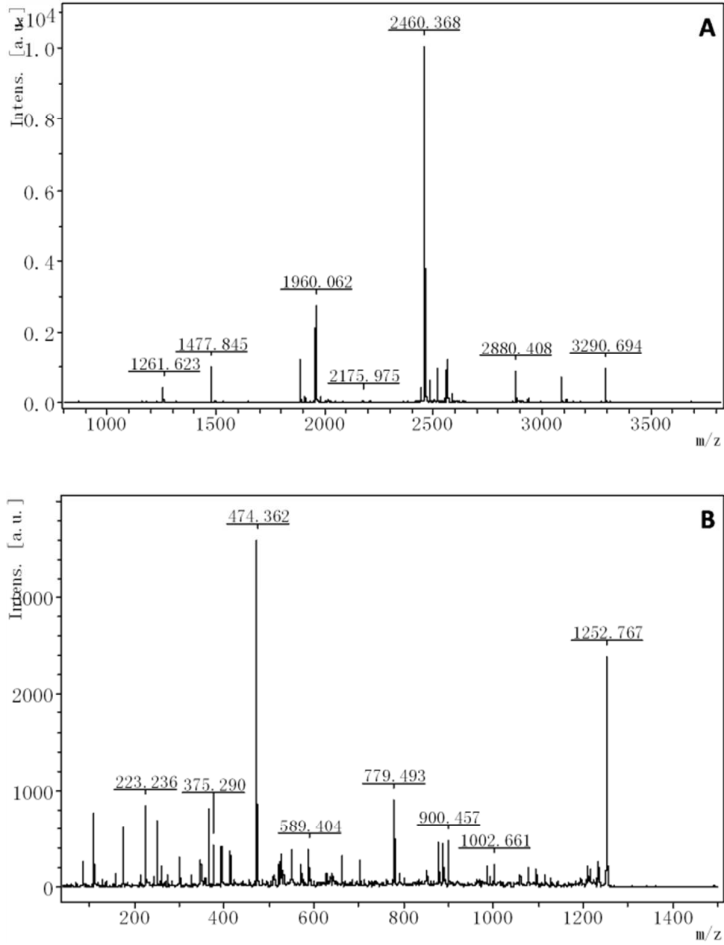

Supplementary Fig.3

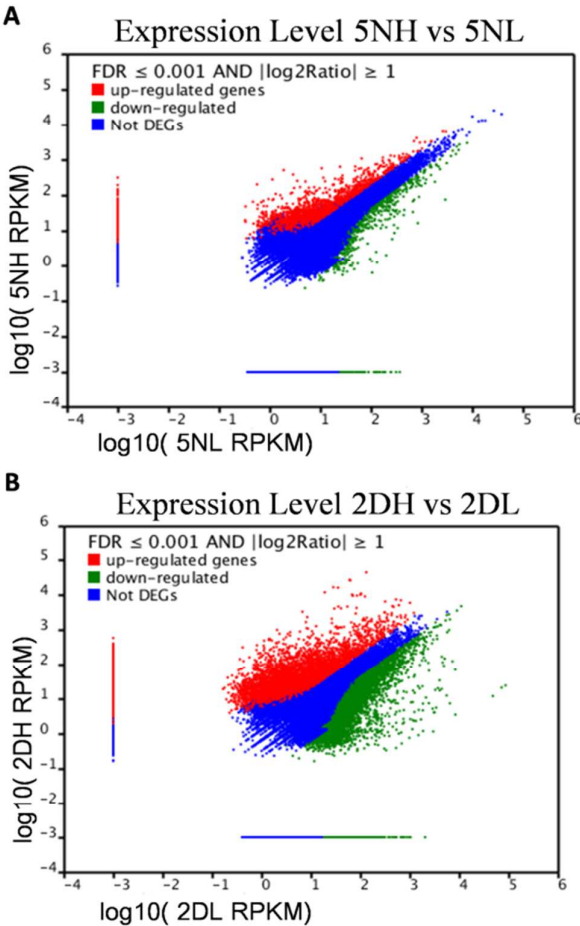

Supplementary Fig.4

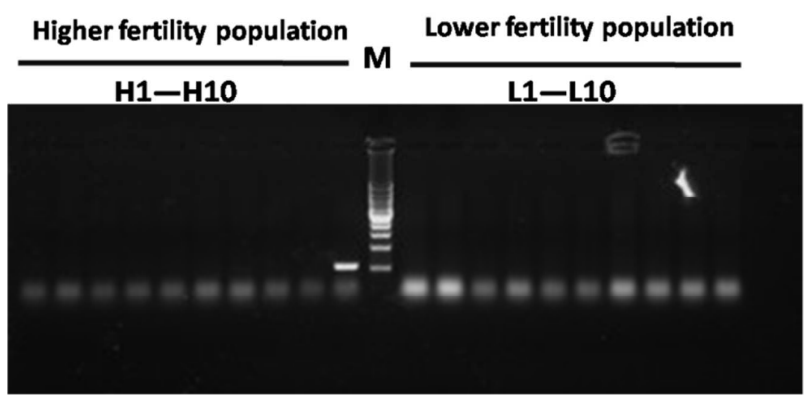

Supplement: Supplementary file 1 [file 4001104]
